# Supplementary material
Source: bioRxiv or medRxiv preprint supplement (https://www.biorxiv.org/highwire/filestream/3441/field_highwire_adjunct_files/11/013631-5.pdf)

A.

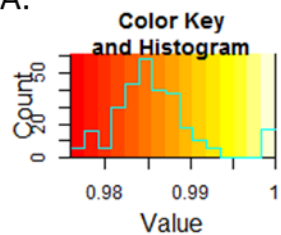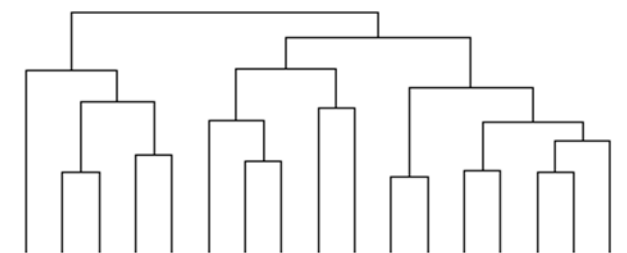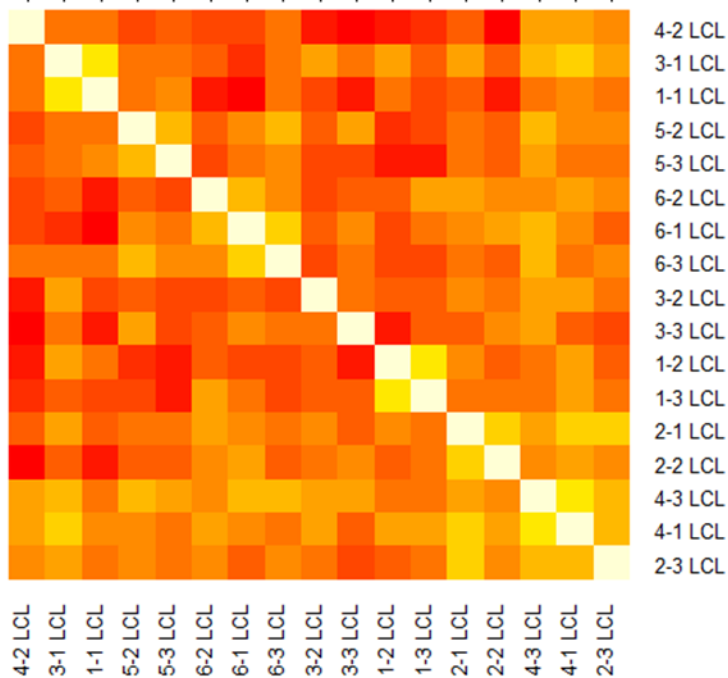

B.

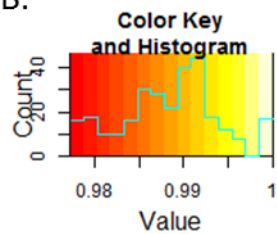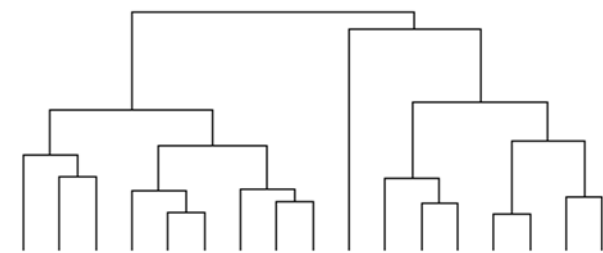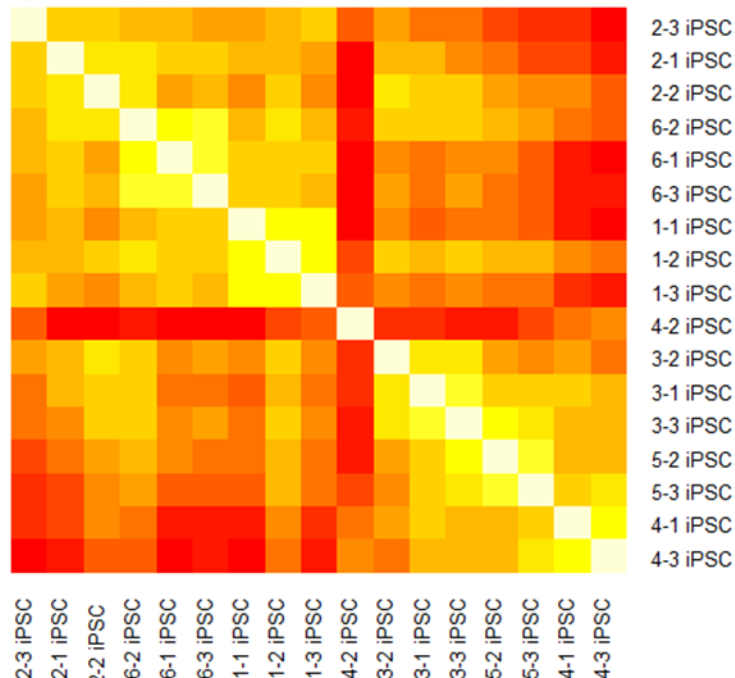

Supplement: Supplementary file [file 013631-5.pdf]
